# Supplementary material for: Synthesis and investigation on liquid crystal and optical properties of dyads based on triphenylene and perylene
Source: Royal Society of Chemistry journal article supplement (doi:10.1039/c7ra01320e), 2017-01-01
Supplement: c7ra01320e1.pdf [file c7ra01320e1.pdf]

Supporting Information

**Synthesis and Investigation on Liquid Crystal and Optical Properties of Dyads Based on Triphenylene and Perylene**

Xiangfei Kong,<sup>a</sup> Liting Xia,<sup>a</sup> Haifeng Zhang,<sup>a</sup> Shengping Dai, Caili Yu,<sup>a</sup> Zheng Liu,<sup>a</sup> Linping Mu,<sup>b</sup> Guixia Wang<sup>\*a</sup> and Zhiqun He<sup>\*c</sup>

---

<sup>a</sup> College of Chemistry and Bioengineering, Guangxi Key Laboratory of Electrochemical and Magnetochemical Functional Materials, Guilin University of Technology, Guilin 541004, China. E-mail: 2010033@glut.edu.cn

<sup>b</sup> School of Physics and Information Engineering, Shanxi Normal University, Linfen 041004, China.

<sup>c</sup> Key Laboratory of Luminescence and Optical Information, Ministry of Education, Institute of Optoelectronic Technology, Beijing Jiaotong University, Beijing 100044, China. E-mail: zhqhe@bjtu.edu.cn



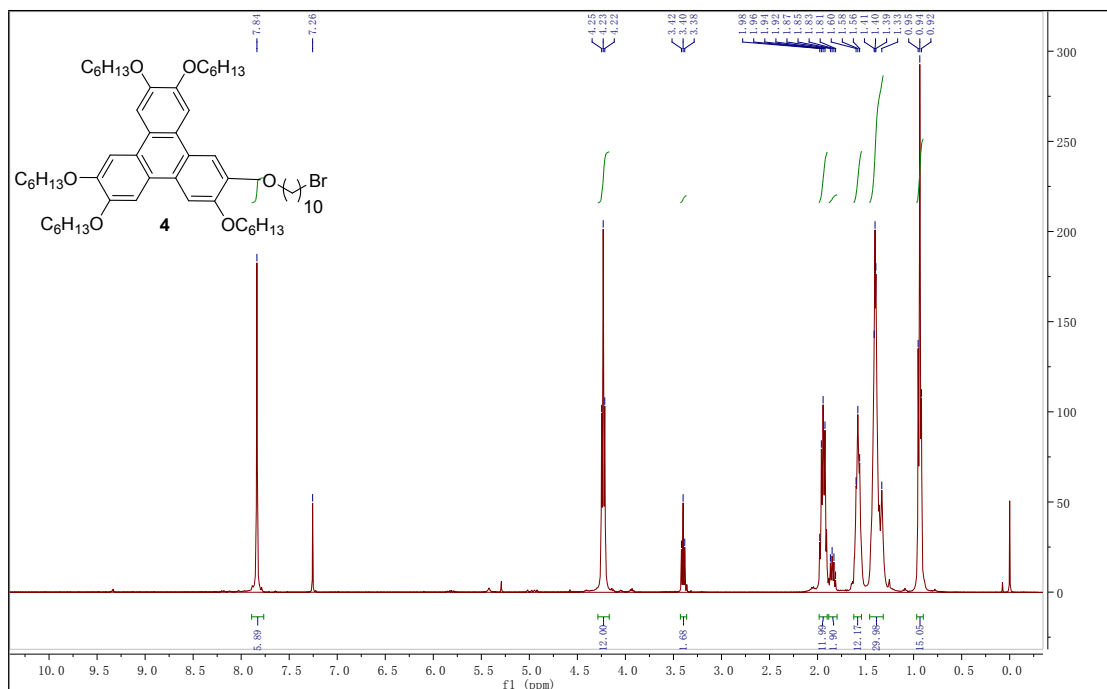

S3 <sup>1</sup>H NMR of Compound 4

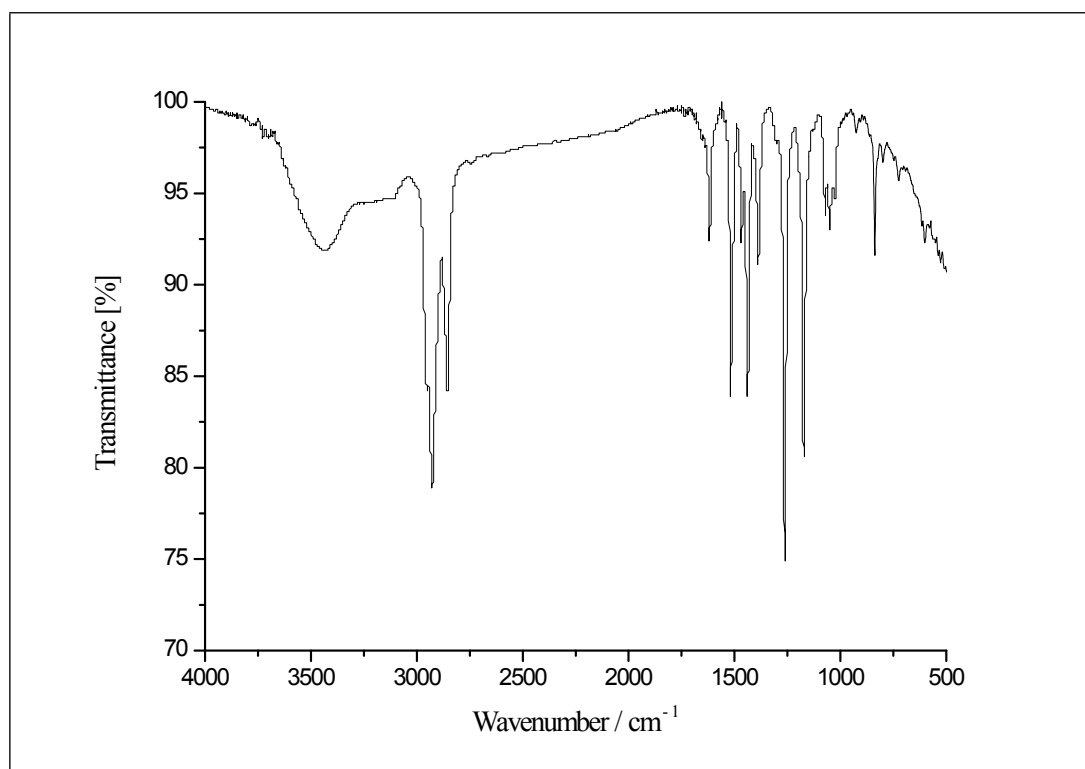

S4 IR of Compound 4

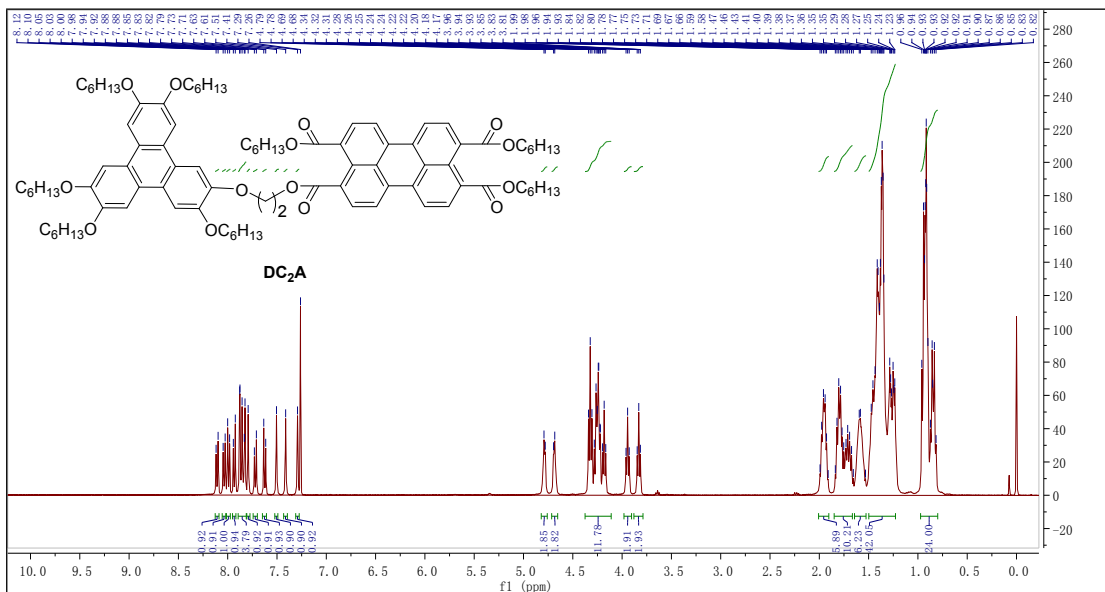

S5 <sup>1</sup>H NMR of DC<sub>2</sub>A

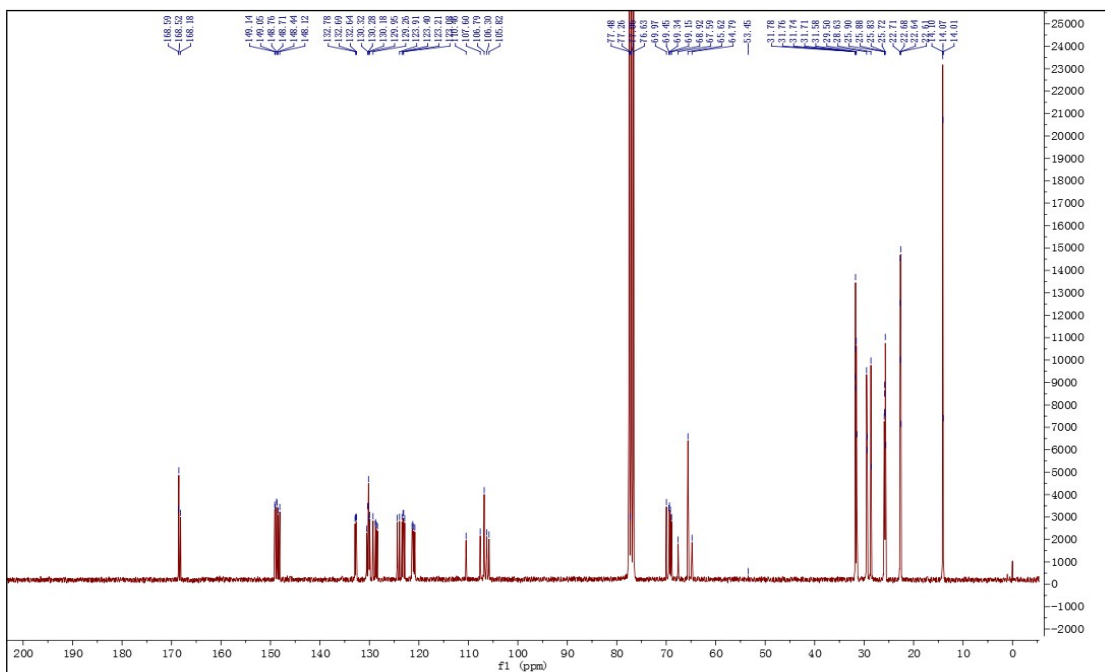

S6 <sup>13</sup>C NMR of DC<sub>2</sub>A

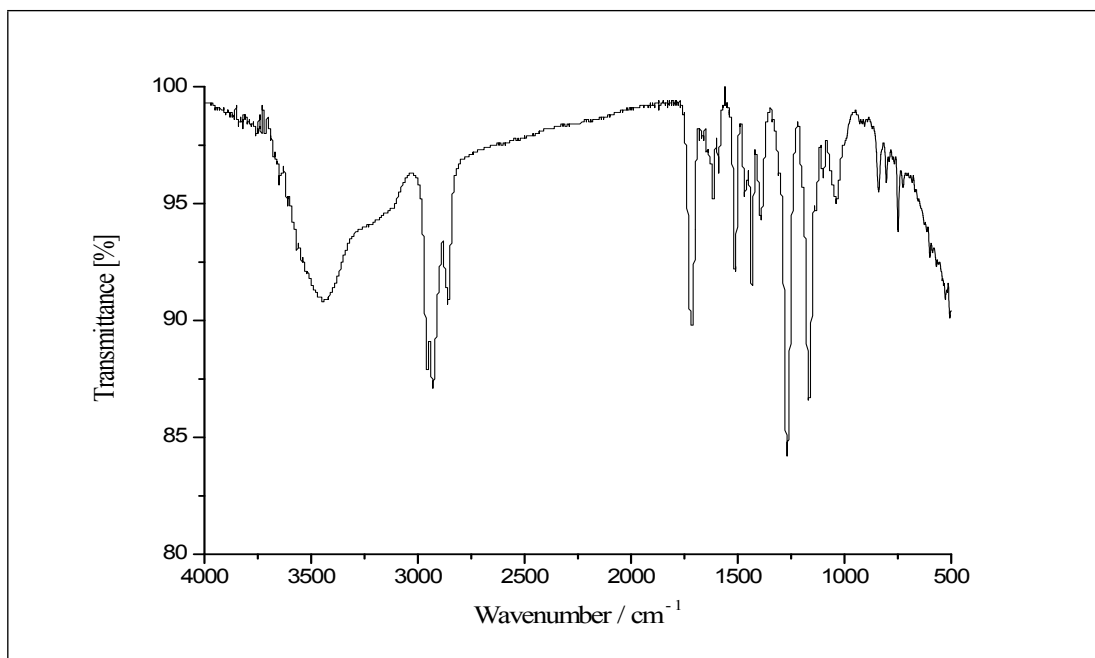

S7 IR of DC<sub>2</sub>A

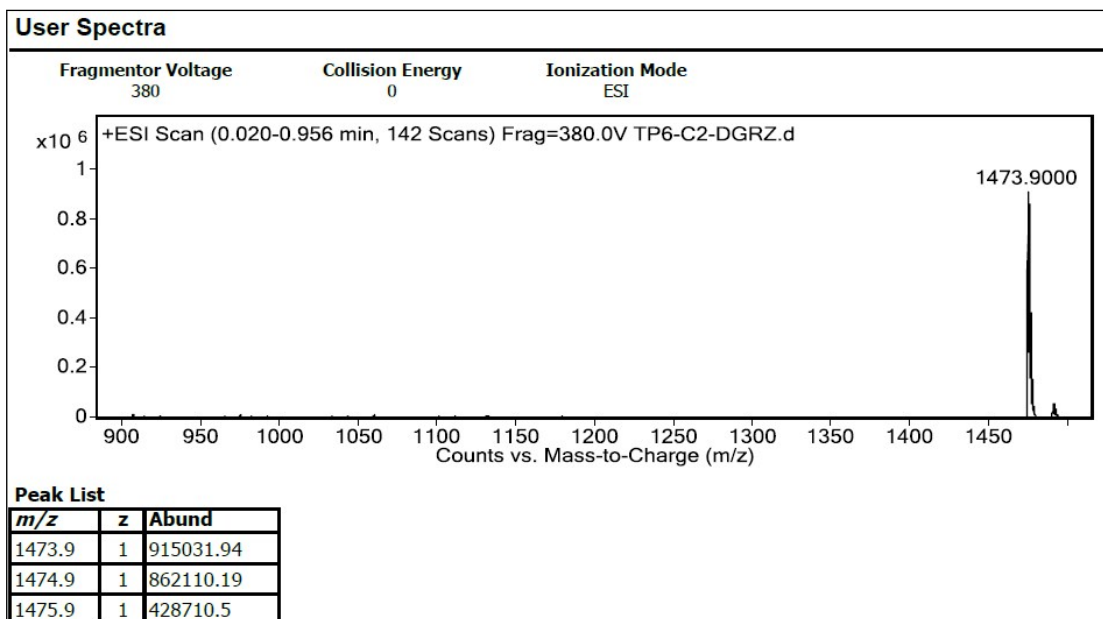

S8 MS of DC<sub>2</sub>A

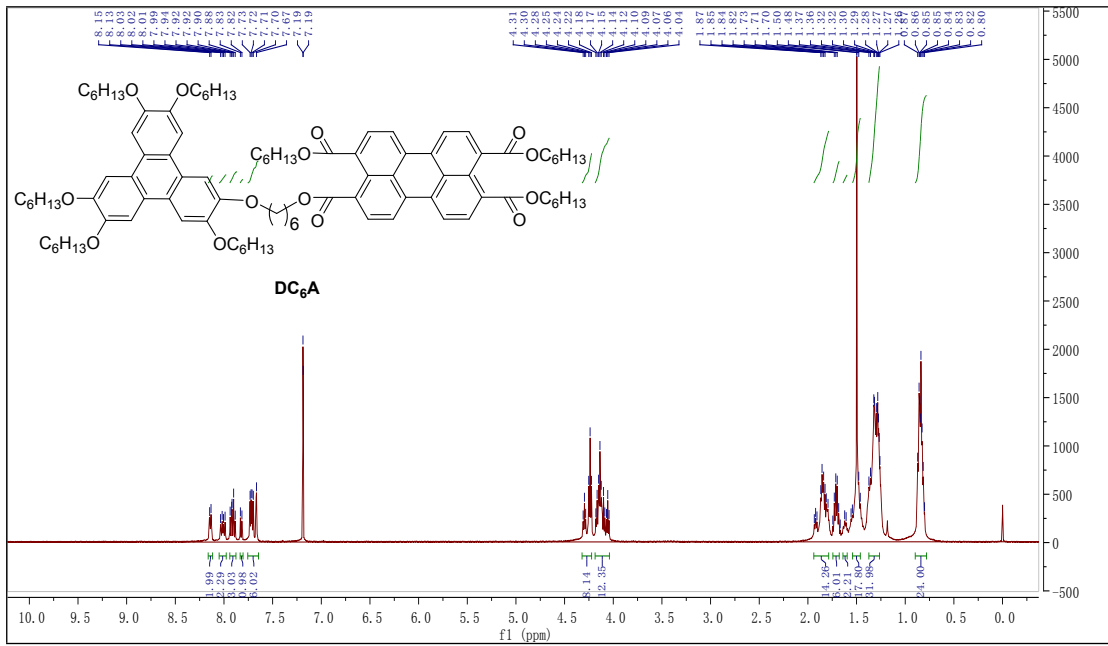

S9 <sup>1</sup>H NMR of DC<sub>6</sub>A

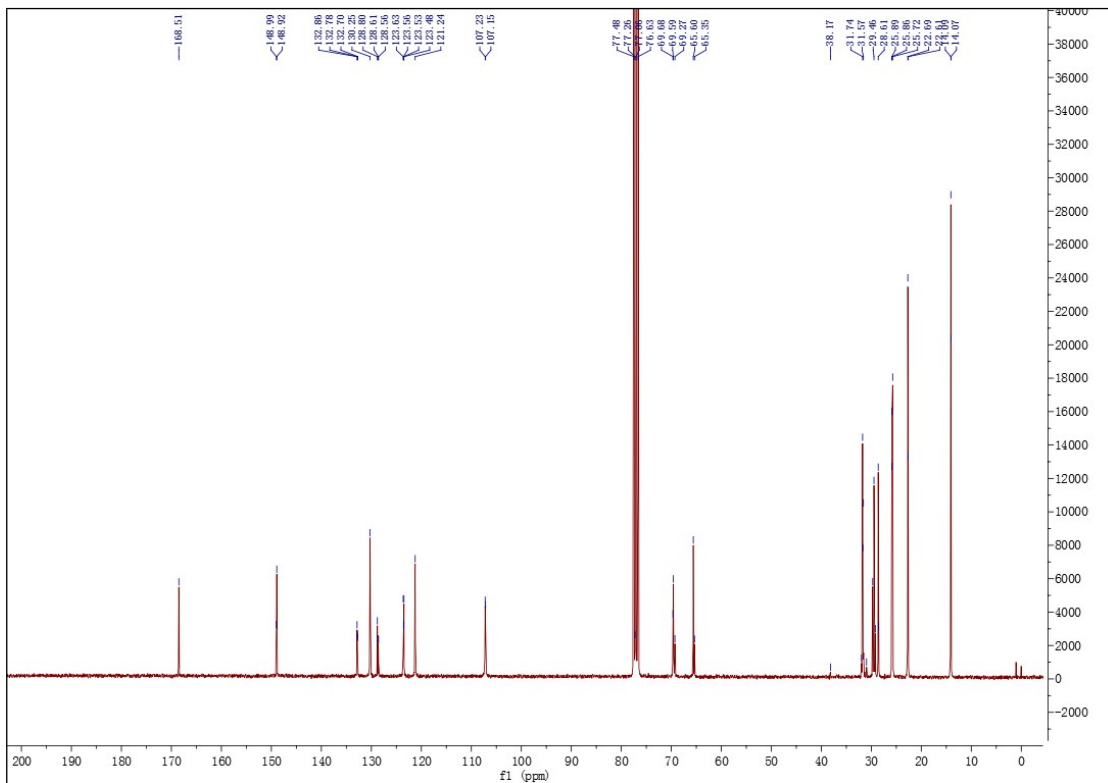

S10 <sup>13</sup>C NMR of DC<sub>6</sub>A

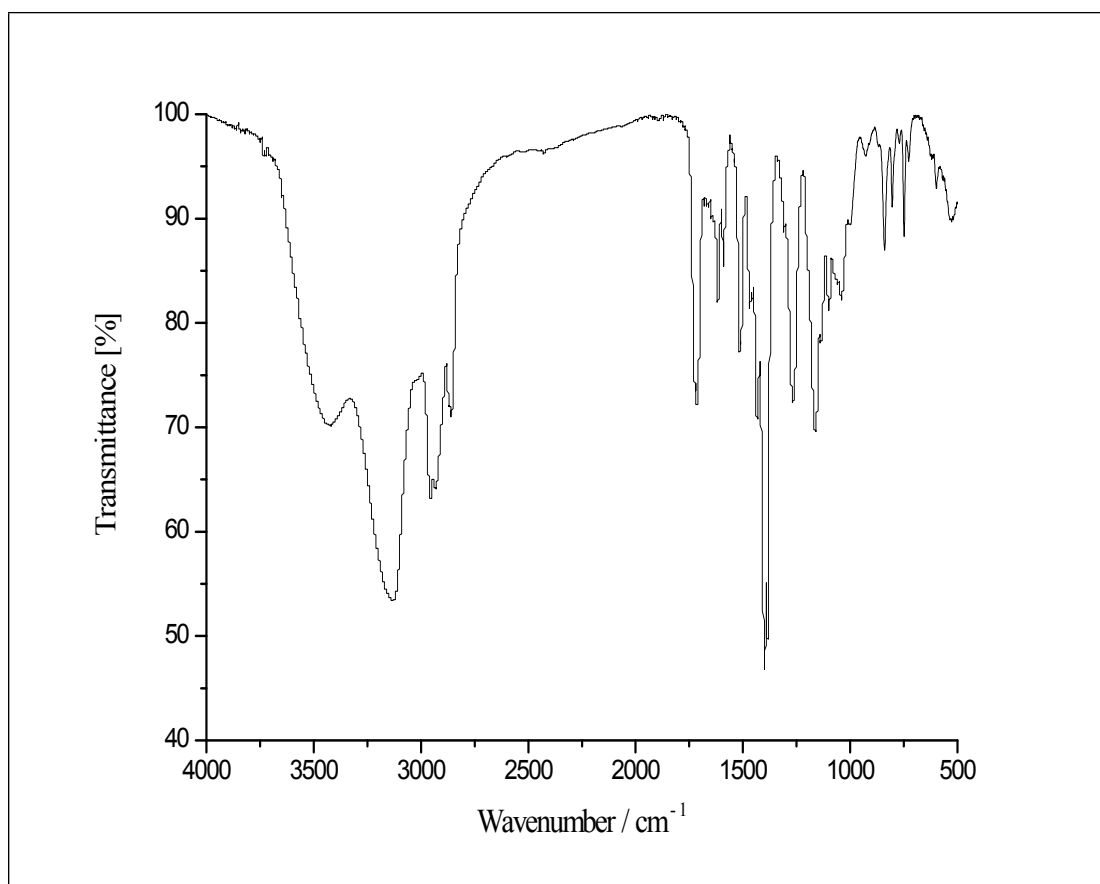

S11 IR of DC<sub>6</sub>A

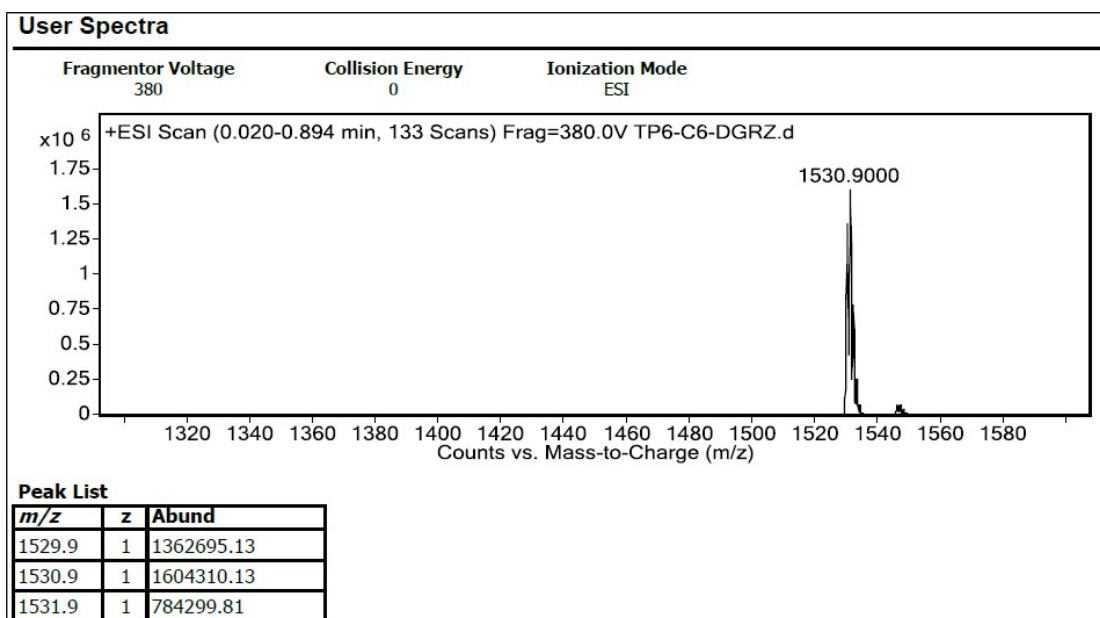

S12 MS of DC<sub>6</sub>A





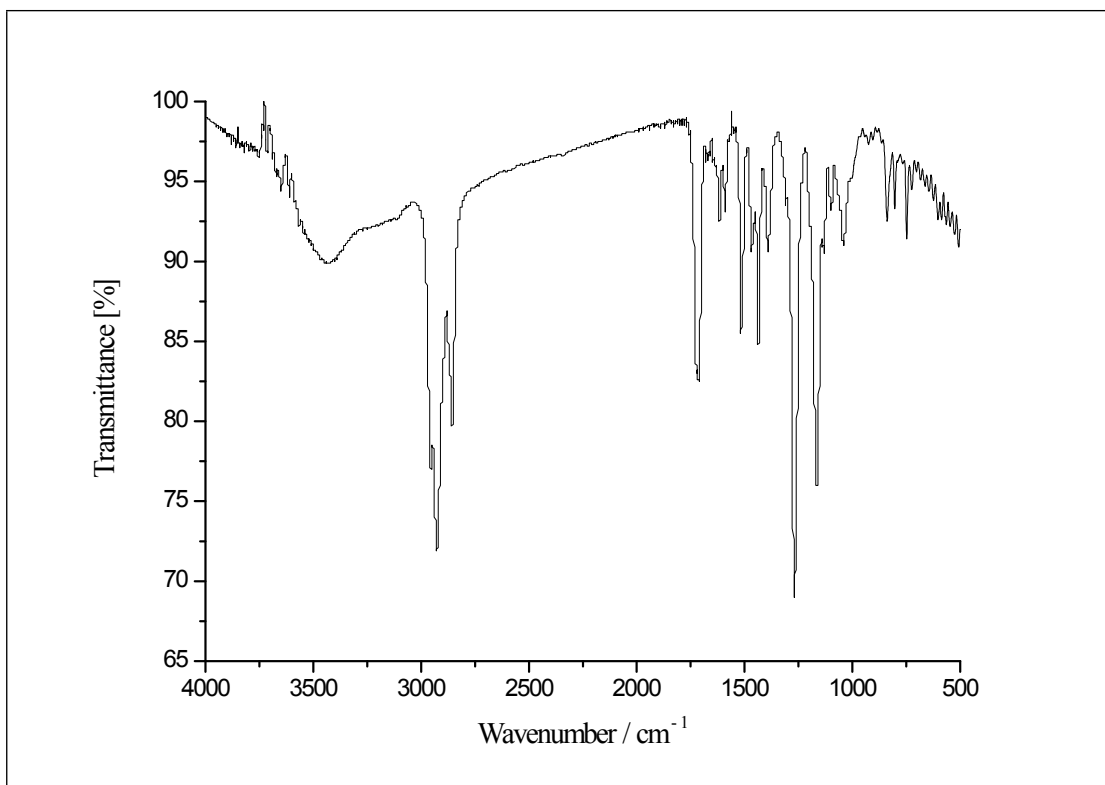

S15 IR of DC<sub>10</sub>A

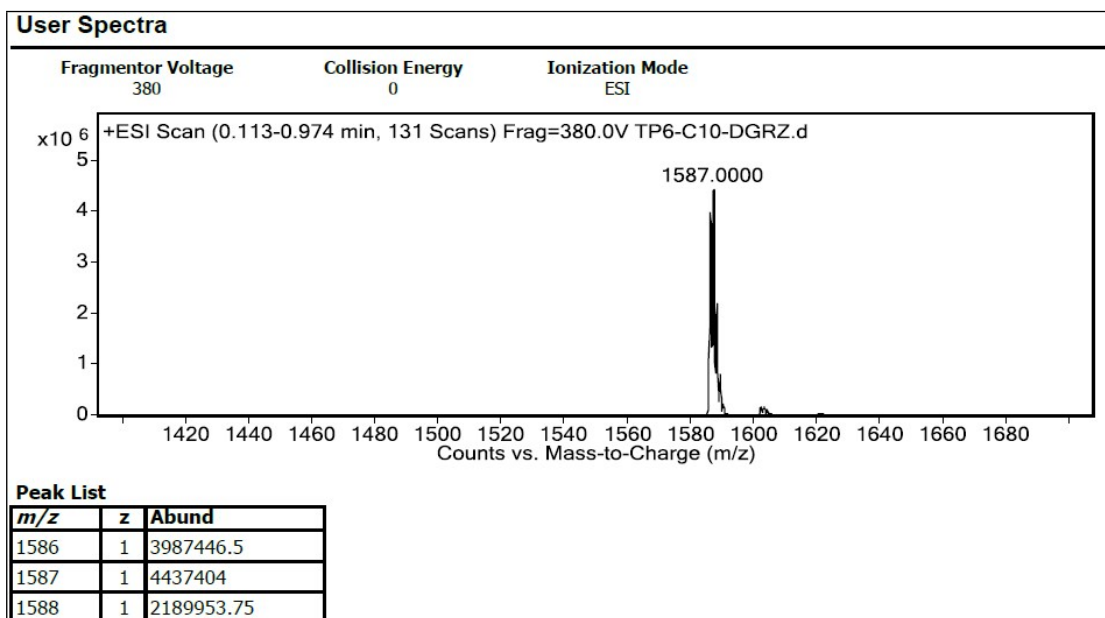

S16 MS of DC<sub>10</sub>A



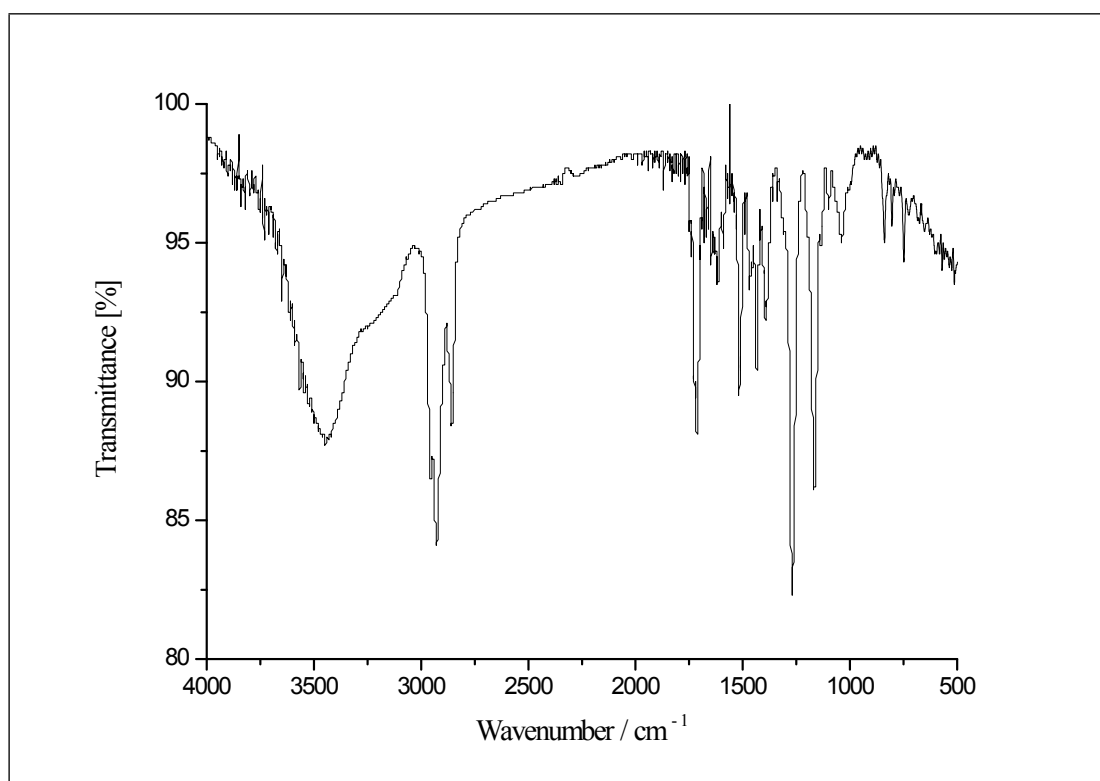

S19 IR of DC<sub>12</sub>A

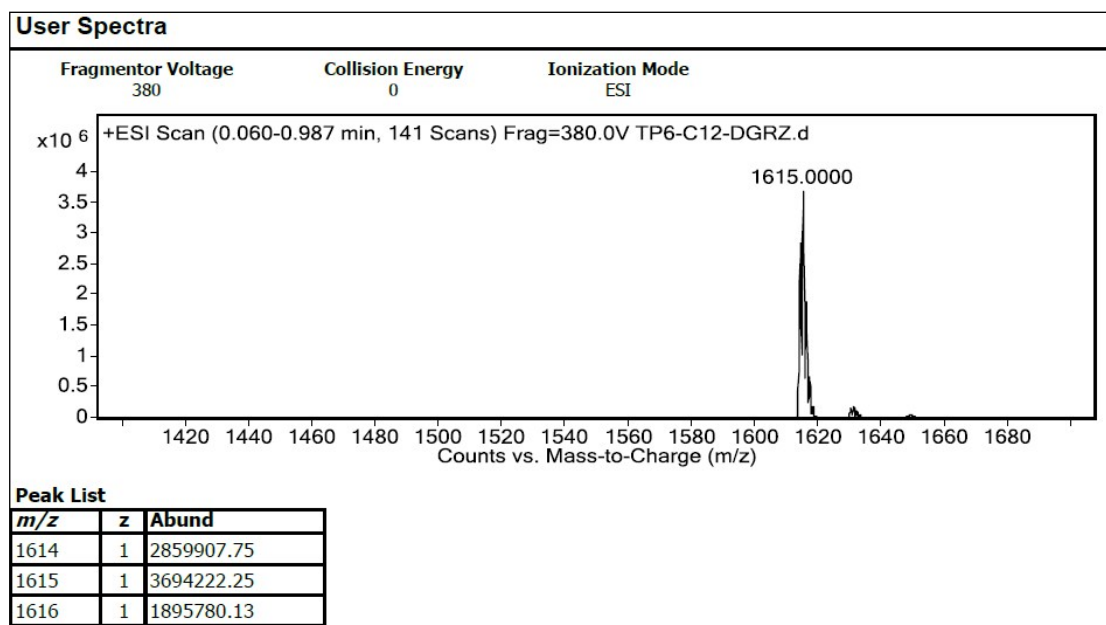

S20 MS of DC<sub>12</sub>A

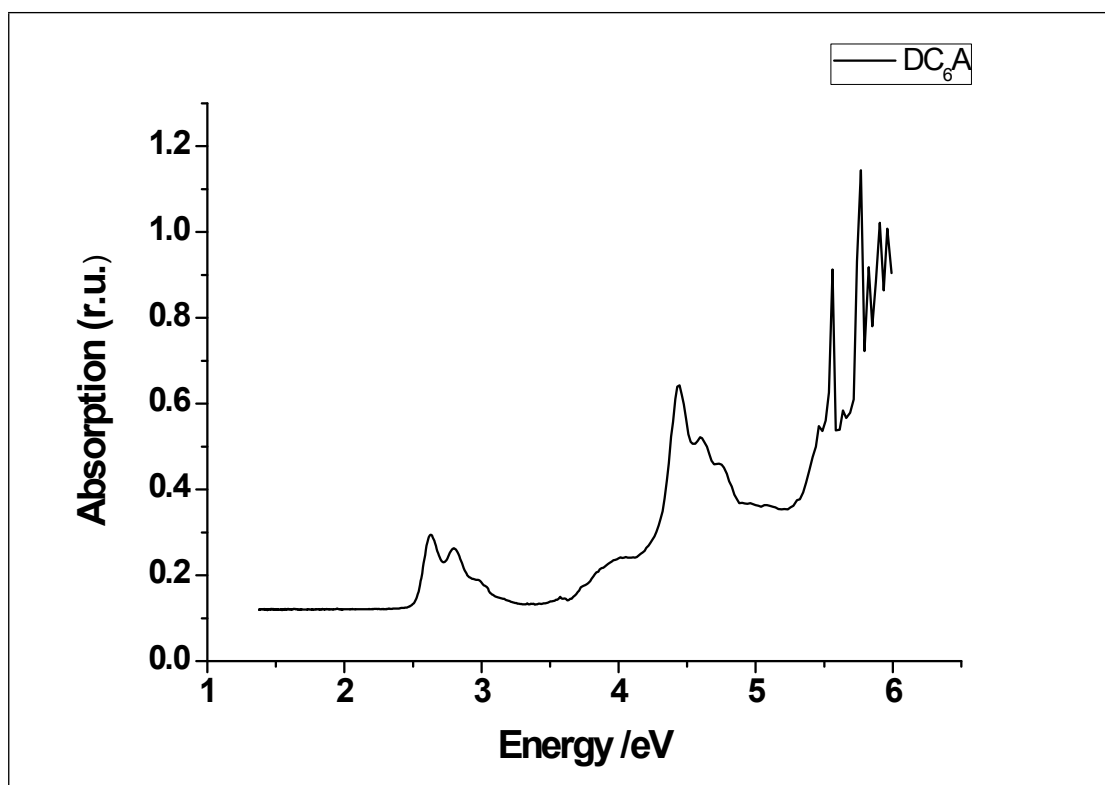

S21 Uv/vis of DC<sub>6</sub>A in DCM solution (concn.= $5 \times 10^{-6}$  mol·L<sup>-1</sup>)
